# Supplementary material for: From liquid to solid-state, solvent-free oxidative ammonolysis of lignins – an easy, alternative approach to generate “N-lignins”
Source: Royal Society of Chemistry journal article supplement (doi:10.1039/d3ra00691c), 2023-01-01
Supplement: d3ra00691c1.pdf [file d3ra00691c1.pdf]

## Supplementary Information

### From liquid to solid-state, solvent-free oxidative ammonolysis of lignins – an easy, alternative approach to generate “N-lignins”

Gerhild K. Wurzer, Markus Bacher, Oliver Musl, Nadine Kohlhuber, Irina Sulaeva, Theres Kelz, Karin Fackler, Robert H. Bischof, Hubert Hettegger, Antje Potthast and Thomas Rosenau

#### List of Figures:

|                                                                                                                                            |    |
|--------------------------------------------------------------------------------------------------------------------------------------------|----|
| Figure 1: <sup>1</sup> H-NMR spectrum of Indulin AT .....                                                                                  | 2  |
| Figure 2: <sup>1</sup> H-NMR spectrum of lignosulfonate .....                                                                              | 2  |
| Figure 3: <sup>1</sup> H NMR spectrum of N-Indulin .....                                                                                   | 3  |
| Figure 4: <sup>1</sup> H spectrum of N-lignosulfonate.....                                                                                 | 3  |
| Figure 5: <sup>1</sup> H, <sup>15</sup> N HMBC spectrum of N-lignosulfonate .....                                                          | 4  |
| Figure 6: <sup>1</sup> H spectrum of SS-N-Indulin .....                                                                                    | 6  |
| Figure 7: <sup>1</sup> H spectrum of SS-N-LS.....                                                                                          | 6  |
| Figure 8: FT-IR spectra of SS-N-Indulin samples .....                                                                                      | 7  |
| Figure 9: FT-IR spectra of SS-N-lignosulfonate samples .....                                                                               | 8  |
| Figure 10: Molar mass distribution of solid-state-N-Indulin samples.....                                                                   | 11 |
| Figure 11: Molar mass distribution of SS-N-lignosulfonate samples.....                                                                     | 11 |
| Figure 12: Starting material and modified samples; A- Indulin, B- N-Indulin, C- SS-N-Indulin, D- Lignosulfonate, E- N-LS, F- SS-N-LS ..... | 12 |

#### List of Tables

|                                                                                                                                               |    |
|-----------------------------------------------------------------------------------------------------------------------------------------------|----|
| Table 1: Calculated statistical moments from MMD measured in DMSO/LiBr based on MALS (785 nm); start material and “classical” AO samples..... | 4  |
| Table 2: Quantitative <sup>31</sup> P NMR data of N-Indulin and N-LS and their starting materials: changes in OH and COOH group contents..... | 4  |
| Table 3: Calculated statistical moments from MMD measured in DMSO/LiBr based on MALS (785 nm); Transition samples.....                        | 5  |
| Table 4: Hydroxyl groups of “transition” samples measured by <sup>31</sup> P NMR, in mmol/g .....                                             | 5  |
| Table 5: Elemental analysis results of solid-state ammonoxidation of Indulin.....                                                             | 8  |
| Table 6: Elemental analysis results of solid-state ammonoxidation of lignosulfonate.....                                                      | 9  |
| Table 7: Molar mass statistical moments of SS-N-Indulin samples, from GPC measurements in DMSO/LiBr with MALS detection (785 nm).....         | 9  |
| Table 8: Molar mass statistical moments of SS-N-lignosulfonate samples, calculated based on the reference (lignosulfonate) sample.....        | 9  |
| Table 9: Hydroxyl groups of solid-state-ammonoxidised N-lignosulfonates measured by <sup>31</sup> P NMR, in mmol/g.....                       | 10 |
| Table 10: Hydroxyl groups of solid-state-ammonoxidised N-Indulin measured by <sup>31</sup> P NMR, in mmol/g .....                             | 10 |

## Starting material

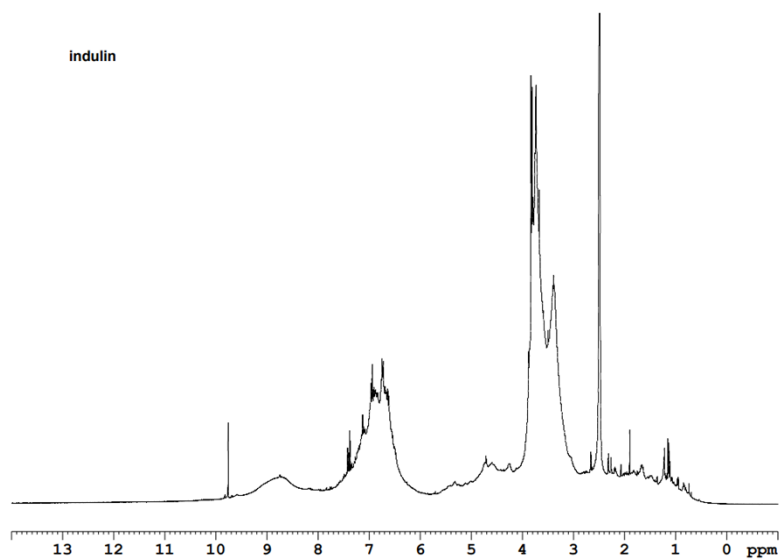

Figure 1: <sup>1</sup>H-NMR spectrum of Indulin AT

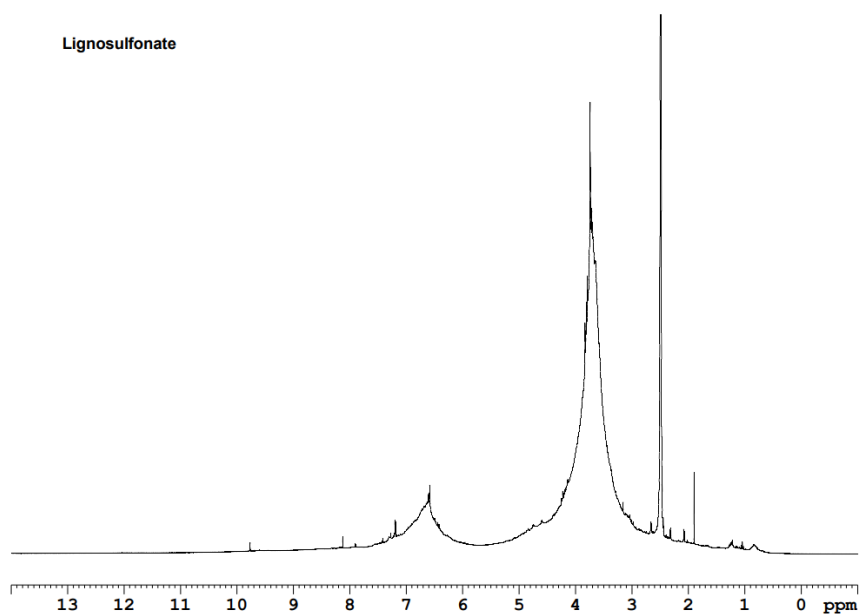

Figure 2: <sup>1</sup>H-NMR spectrum of lignosulfonate

**“classical” ammonoxidation samples**

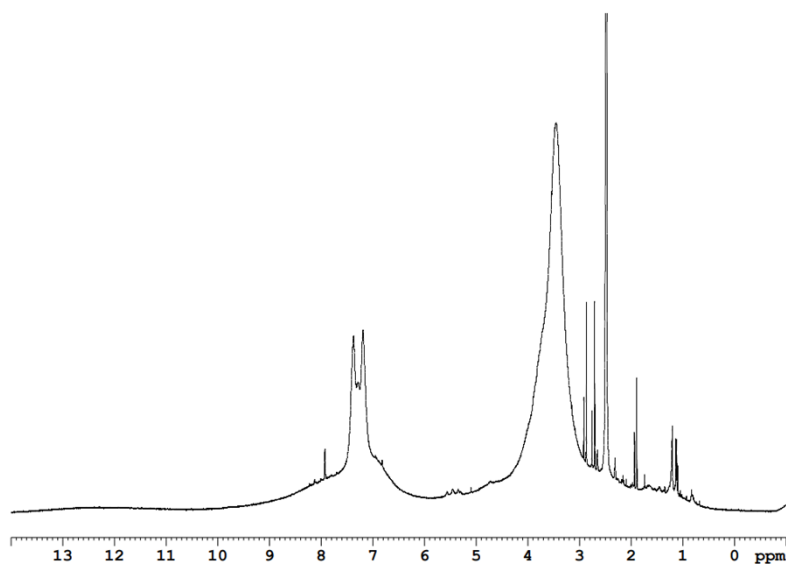

*Figure 3: <sup>1</sup>H NMR spectrum of N-Indulin*

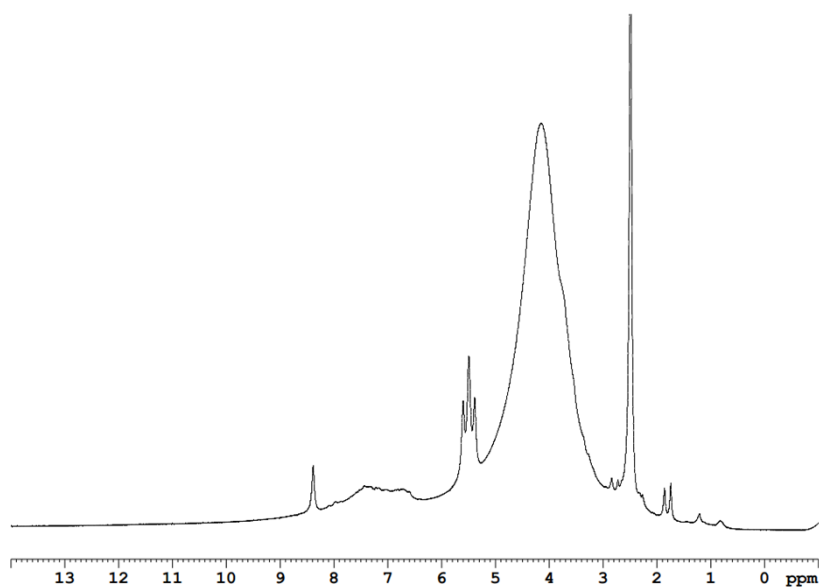

*Figure 4: <sup>1</sup>H spectrum of N-lignosulfonate*

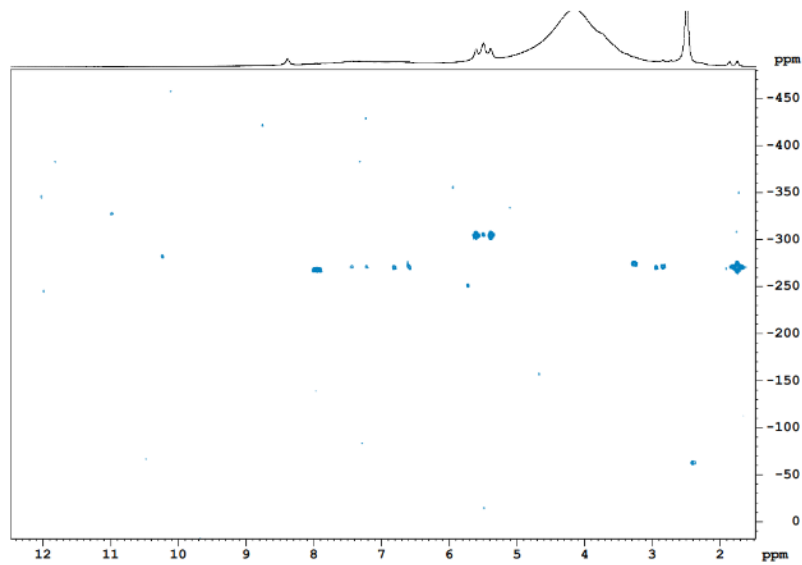

Figure 5:  $^1\text{H}$ ,  $^{15}\text{N}$  HMBC spectrum of N-lignosulfonate

**Table 1.** Calculated statistical moments from MMD measured in DMSO/LiBr based on MALS (785 nm); start material and “classical” AO samples

| Sample    | $M_n$<br>(Da) | $M_w$<br>(Da) | $M_z$<br>(Da) | $\bar{D}$ |
|-----------|---------------|---------------|---------------|-----------|
| Indulin   | 2520          | 10470         | 41360         | 4.15      |
| N-Indulin | 6510          | 156910        | 95279         | 24.09     |
| LS        | 1948          | 6393          | 21560         | 3.28      |
| N-LS      | 1650          | 5350          | 12690         | 3.25      |

**Table 2.** Quantitative  $^{31}\text{P}$  NMR data of N-Indulin and N-LS and their starting materials: changes in OH and COOH group contents; OH group content in mmol/g

| Sample           | aliphatic OH | syringyl &<br>condensed OH | guaiacyl &<br>catechol OH | carboxylic<br>OH | aromatic<br>OH | total<br>OH |
|------------------|--------------|----------------------------|---------------------------|------------------|----------------|-------------|
| Indulin          | 1.95         | 1.53                       | 2.22                      | 0.45             | 3.74           | 5.70        |
| N-Indulin        | 0.97         | 0.49                       | 0.44                      | 0.76             | 0.92           | 1.89        |
| Lignosulfonate   | 2.14         | 1.97                       | 0.95                      | 0.22             | 2.92           | 5.06        |
| N-Lignosulfonate | 0.66         | 0.42                       | 0.21                      | 1.34             | 0.63           | 1.29        |

## “transition” ammonoxidation samples

**Table 3.** Calculated statistical moments from MMD measured in DMSO/LiBr based on MALS (785 nm); Transition samples

| Sample       | M <sub>n</sub> (Da) | M <sub>w</sub> (Da) | M <sub>z</sub> (Da) | Đ     |
|--------------|---------------------|---------------------|---------------------|-------|
| Indulin      | 2520                | 10470               | 41360               | 4.15  |
| Tr.-N-Ind. 1 | 6130                | 12330               | 1223800             | 20.11 |
| Tr.-N-Ind. 2 | 3420                | 64010               | 518390              | 18.71 |
| Tr.-N-Ind. 3 | 10850               | 8160                | 554260              | 7.50  |
| Tr.-N-Ind. 4 | 6080                | 33820               | 112250              | 5.57  |
| Tr.-N-Ind. 5 | 6330                | 60780               | 383020              | 9.60  |

**Table 4.** Hydroxyl groups of “transition” samples measured by <sup>31</sup>P NMR, in mmol/g

| Sample       | Aliphatic OH | syringyl & condensed OH | guaiacyl & catechol OH | carboxylic OH | aromatic OH | total OH |
|--------------|--------------|-------------------------|------------------------|---------------|-------------|----------|
| Tr. N-Ind. 1 | 1.15         | 0.82                    | 1.06                   | 0.42          | 1.88        | 3.03     |
| Tr.-N-Ind. 2 | 2.04         | 1.26                    | 1.98                   | 0.48          | 3.24        | 5.28     |
| Tr.-N-Ind. 3 | 1.90         | 1.00                    | 1.01                   | 0.96          | 2.01        | 3.90     |
| Tr.-N-Ind. 4 | 1.69         | 0.95                    | 1.17                   | 0.96          | 2.12        | 3.81     |
| Tr.-N-Ind. 5 | 1.57         | 1.03                    | 1.43                   | 0.70          | 2.46        | 4.03     |

**“solid-state” ammonoxidation samples**

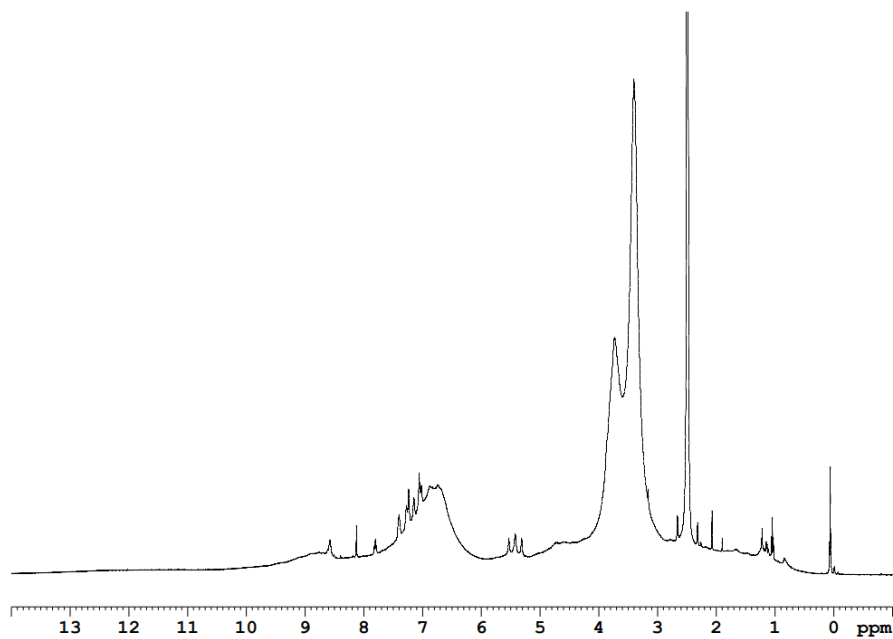

*Figure 6: <sup>1</sup>H spectrum of SS-N-Indulin*

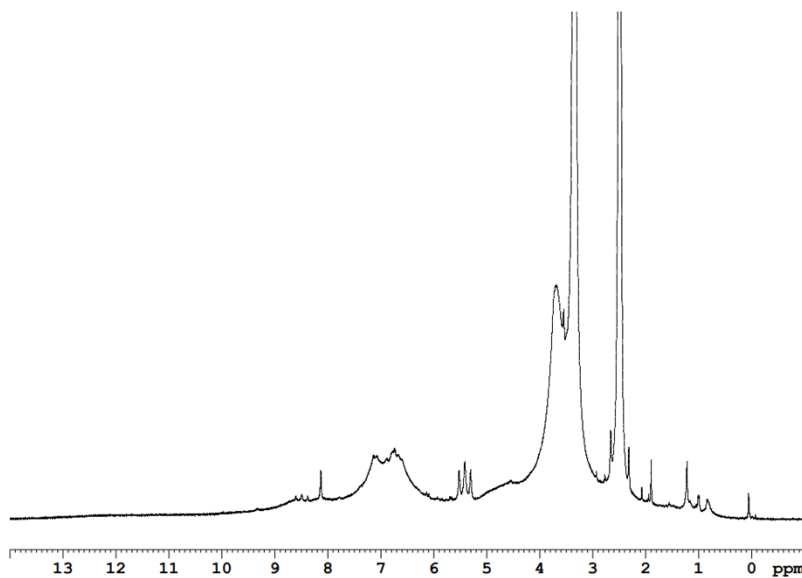

*Figure 7: <sup>1</sup>H spectrum of SS-N-LS*

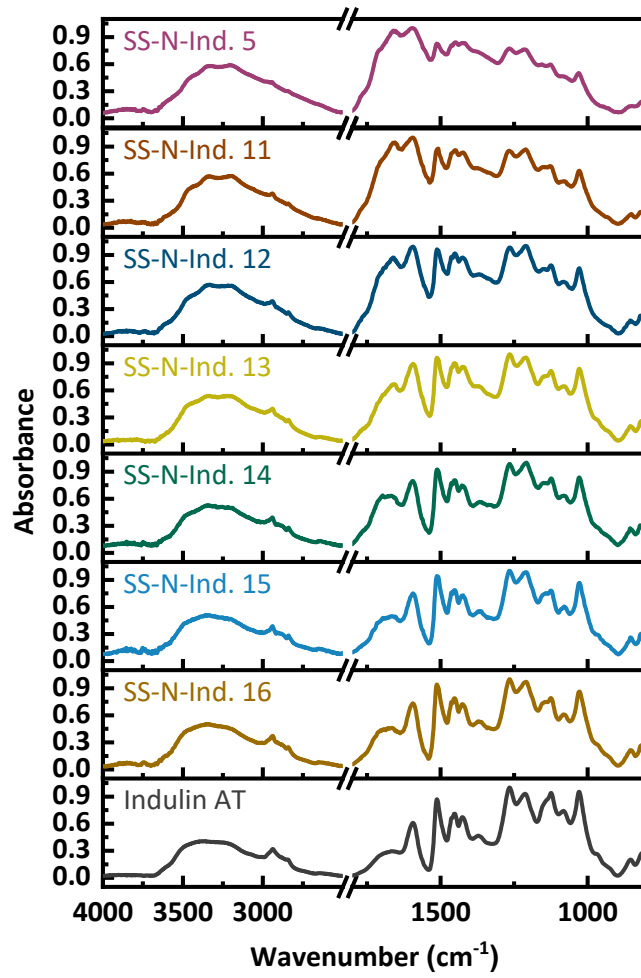

Figure 8: FT-IR spectra of SS-N-Indulin samples

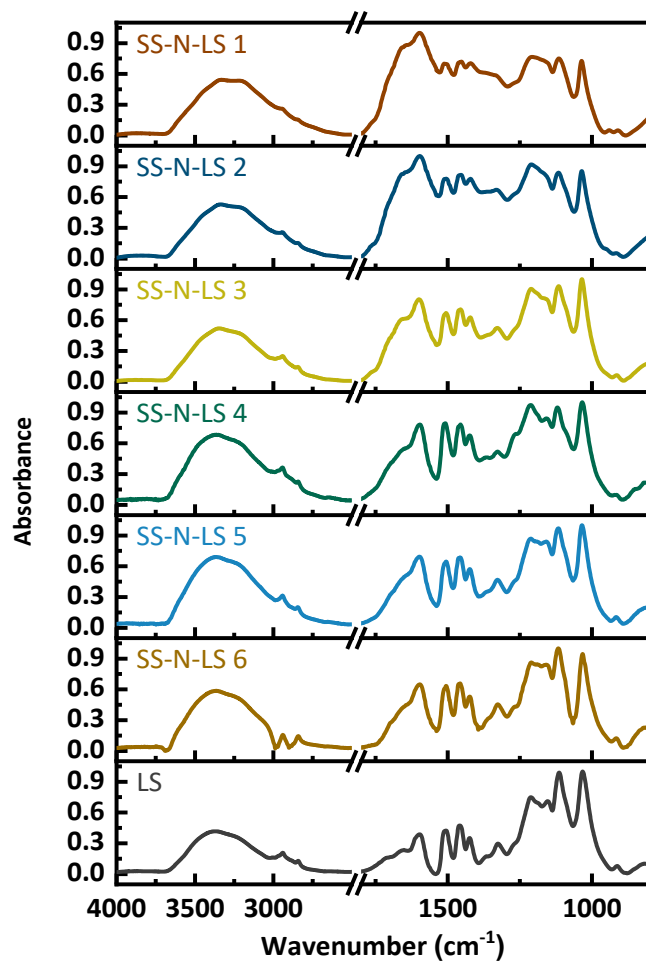

Figure 9: FT-IR spectra of SS-N-lignosulfonate samples

Table 5. Elemental analysis results of solid-state ammonoxidation of Indulin

| Sample       | m (g) | C %   | H %  | N %  | S %  | O %   |
|--------------|-------|-------|------|------|------|-------|
| SS-N-Ind. 5  | 0.55  | 56.17 | 4.95 | 9.55 | 0.58 | 27.28 |
| SS-N-Ind. 11 | 1.10  | 57.56 | 5.31 | 6.19 | 0.83 | 26.66 |
| SS-N-Ind. 12 | 2.20  | 60.72 | 5.41 | 3.84 | 0.92 | 26.94 |
| SS-N-Ind. 13 | 5.00  | 59.36 | 5.51 | 4.08 | 1.07 | 27.21 |
| SS-N-Ind. 14 | 7.50  | 60.91 | 5.32 | 3.63 | 0.89 | 27.01 |
| SS-N-Ind. 15 | 10    | 63.30 | 5.65 | 1.68 | 1.02 | 27.49 |
| SS-N-Ind. 16 | 20    | 63.45 | 5.69 | 1.53 | 1.11 | 27.39 |



**Table 6.** Elemental analysis results of solid-state ammonoxidation of lignosulfonate

| Sample    | m (g) | C %                          | H %  | N %   | S %  | O %   |
|-----------|-------|------------------------------|------|-------|------|-------|
| SS-N-LS 1 | 0.55  | 44.46                        | 4.27 | 11.27 | 2.09 | 32.78 |
| SS-N-LS 2 | 1.10  | 48.59                        | 4.55 | 9.25  | 3.17 | 32.17 |
| SS-N-LS 3 | 2.20  | 47.89                        | 4.84 | 5.30  | 2.93 | 34.59 |
| SS-N-LS 4 | 5.00  | 48.26                        | 5.08 | 2.41  | 3.81 | 36.18 |
| SS-N-LS 5 | 7.50  | 48.40                        | 5.20 | 2.13  | 3.97 | 37.29 |
| SS-N-LS 6 | 10    | 47.63                        | 5.09 | 1.72  | 3.82 | 36.96 |
| SS-N-LS 7 | 20    | no space in the parr reactor |      |       |      |       |

**Table 7.** Molar mass statistical moments of SS-N-Indulin samples, from GPC measurements in DMSO/LiBr with MALS detection (785 nm)

| Sample  | M <sub>n</sub> (Da) | M <sub>w</sub> (Da) | M <sub>z</sub> (Da) | Đ    |
|---------|---------------------|---------------------|---------------------|------|
| Indulin | 2520                | 10470               | 41360               | 4.15 |

**Table 10.** Hydroxyl groups of solid-state-ammonoxidised N-Indulin measured by <sup>31</sup>P NMR, in mmol/g

| Sample       | Aliphatic OH | syringyl & condensed OH | guaiacyl & catechol OH | carboxylic OH | aromatic OH | total OH |
|--------------|--------------|-------------------------|------------------------|---------------|-------------|----------|
| SS-N-Ind. 5  |              | 3520                    | 27840                  |               | 154780      | 7.91     |
| SS-N-Ind. 11 |              | 3050                    | 32390                  |               | 306580      | 10.62    |
| SS-N-Ind. 12 |              | 2750                    | 36400                  |               | 377940      | 13.24    |
| SS-N-Ind. 13 |              | 2770                    | 18590                  |               | 93180       | 6.71     |

**Table 8.** Molar mass statistical moments of SS-N-lignosulfonate samples, calculated based on the reference (lignosulfonate) sample

| Sample       | M <sub>n</sub> (Da) | M <sub>w</sub> (Da) | M <sub>z</sub> (Da) | Đ     |
|--------------|---------------------|---------------------|---------------------|-------|
| LS           | 1948                | 6393                | 21560               | 3.28  |
| SS-N-LS 1    | 1991                | 6459                | 21328               | 3.24  |
| SS-N-LS 2    | 2460                | 12365               | 57645               | 5.03  |
| SS-N-LS 3    | 3557                | 15642               | 61582               | 4.40  |
| SS-N-LS 4    | 5318                | 16524               | 43163               | 3.11  |
| SS-N-LS 5    | 6387                | 20709               | 55125               | 3.24  |
| SS-N-LS 6    | 4687                | 18600               | 53681               | 3.97  |
| SS-N-Ind. 14 | 3120                | 47780               | 491370              | 15.34 |
| SS-N-Ind. 15 | 2790                | 16120               | 84690               | 5.78  |
| SS-N-Ind. 16 | 2350                | 12840               | 61100               | 5.46  |

**Table 9.** Hydroxyl groups of solid-state-ammonoxidised *N*-lignosulfonates measured by <sup>31</sup>P NMR, in mmol/g

| Sample                | Aliphatic<br>OH | syringyl &<br>condensed OH | guaiacyl &<br>catechol OH | carboxylic<br>OH | aromatic<br>OH | total<br>OH |
|-----------------------|-----------------|----------------------------|---------------------------|------------------|----------------|-------------|
| <i>Lignosulfonate</i> | 2.14            | 1.97                       | 2.06                      | 0.22             | 2.92           | 5.06        |
| <i>SS-N-LS 1</i>      | 0.54            | 0.87                       | 0.60                      | 0.47             | 1.47           | 2.01        |
| <i>SS-N-LS 2</i>      | 1.58            | 1.33                       | 2.10                      | 0.45             | 3.43           | 5.01        |
| <i>SS-N-LS 3</i>      | 0.96            | 1.42                       | 0.77                      | 0.31             | 2.20           | 3.16        |
| <i>SS-N-LS 4</i>      | 2.32            | 1.60                       | 2.42                      | 0.45             | 4.02           | 5.22        |
| <i>SS-N-LS 5</i>      | 1.60            | 1.66                       | 0.73                      | 0.30             | 2.39           | 3.99        |
| <i>SS-N-LS 6</i>      | 1.71            | 1.84                       | 0.82                      | 0.22             | 2.66           | 4.37        |

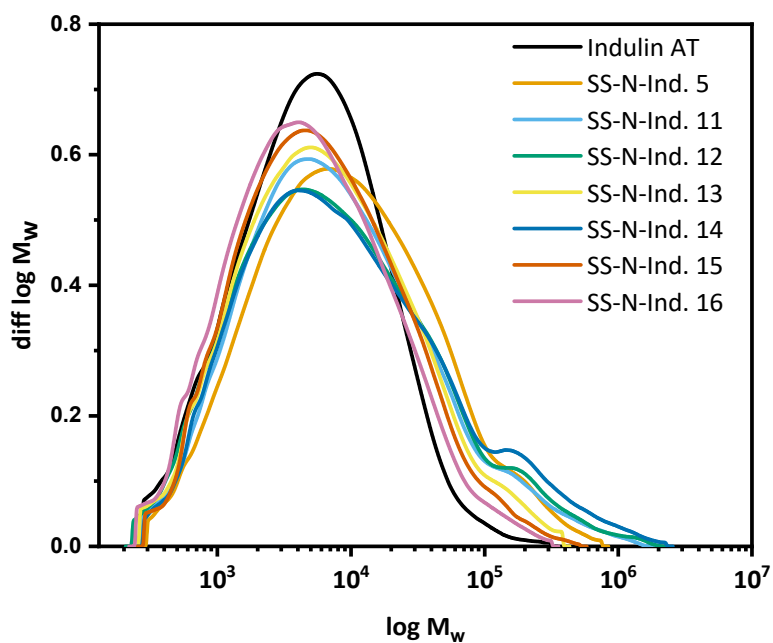

Figure 10: Molar mass distribution of solid-state-*N*-Indulin samples

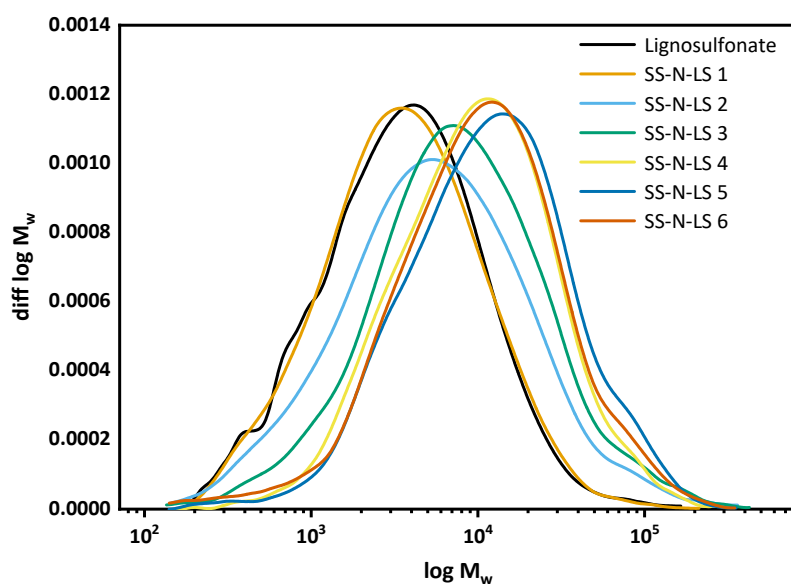

Figure 11: Molar mass distribution of SS-N-lignosulfonate samples

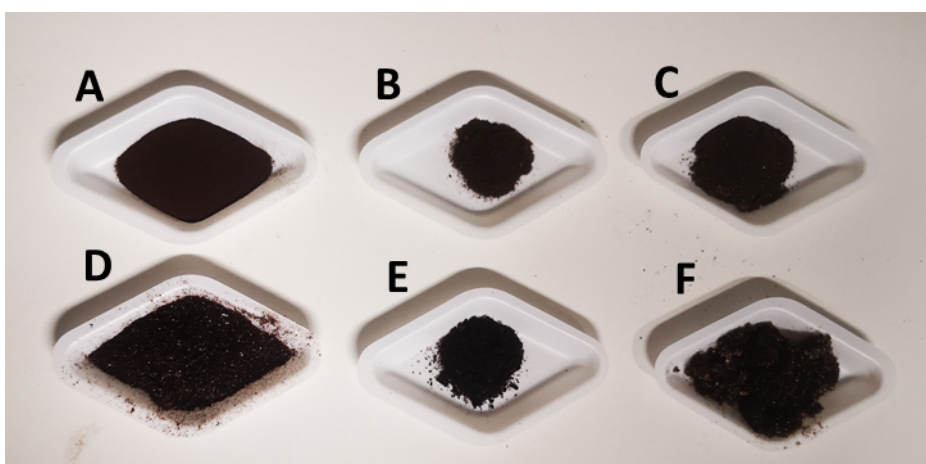

Figure 12: Starting material and modified samples; A- Indulin, B- N-Indulin, C- SS-N-Indulin, D- Lignosulfonate, E- N-LS, F- SS-N-LS
